# Supplementary material for: Influence of common assumptions regarding aerosol composition and mixing state on predicted CCN concentration
Source: Copernicus journal article supplement (doi:10.5194/acp-2017-516), 2017-06-19
Supplement: Supplementary file 1 [file acp-2017-516-supplement.pdf]

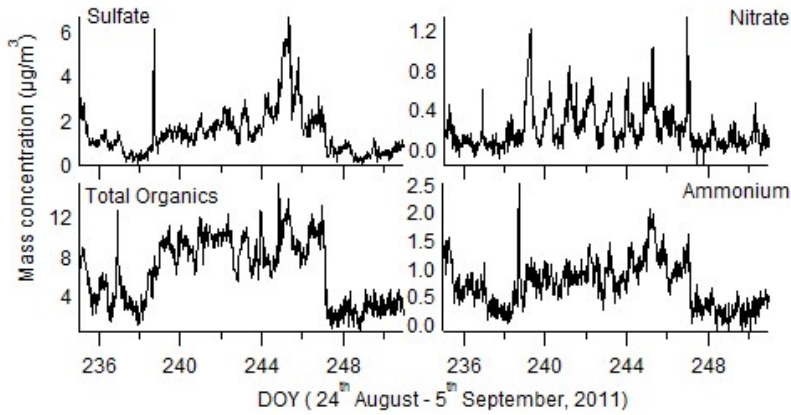

**Figure S1:** Example of recorded variation in aerosol species mass concentrations from 24<sup>th</sup> August - 5<sup>th</sup> September, 2011. DOY = day of year.

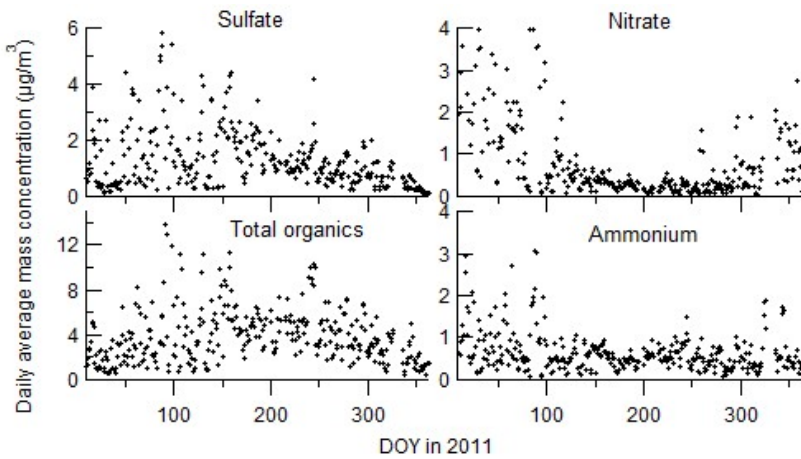

**Figure S2:** Seasonal variation in aerosol species mass concentrations in 2011. DOY = day of year.

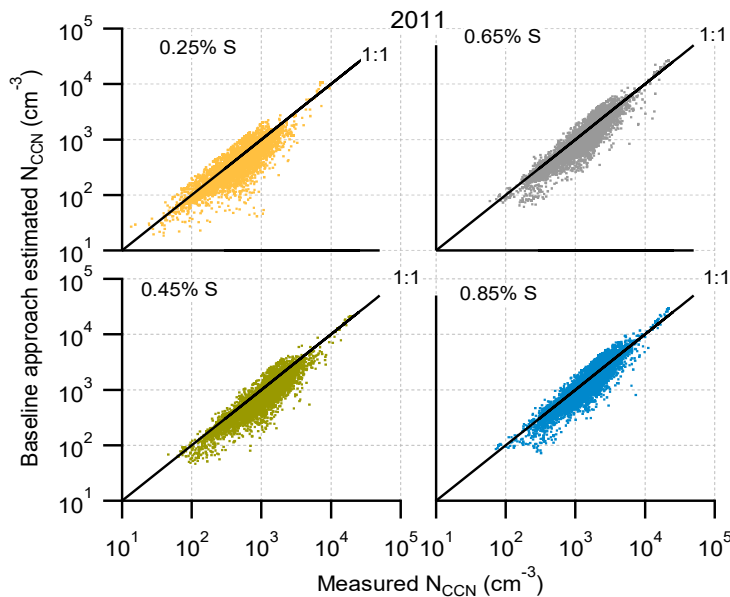

**Figure S3:** Baseline approach estimated vs. measured  $N_{\text{CCN}}$  at 0.25%, 0.45%, 0.65%, and 0.85% S for all data from 2011.

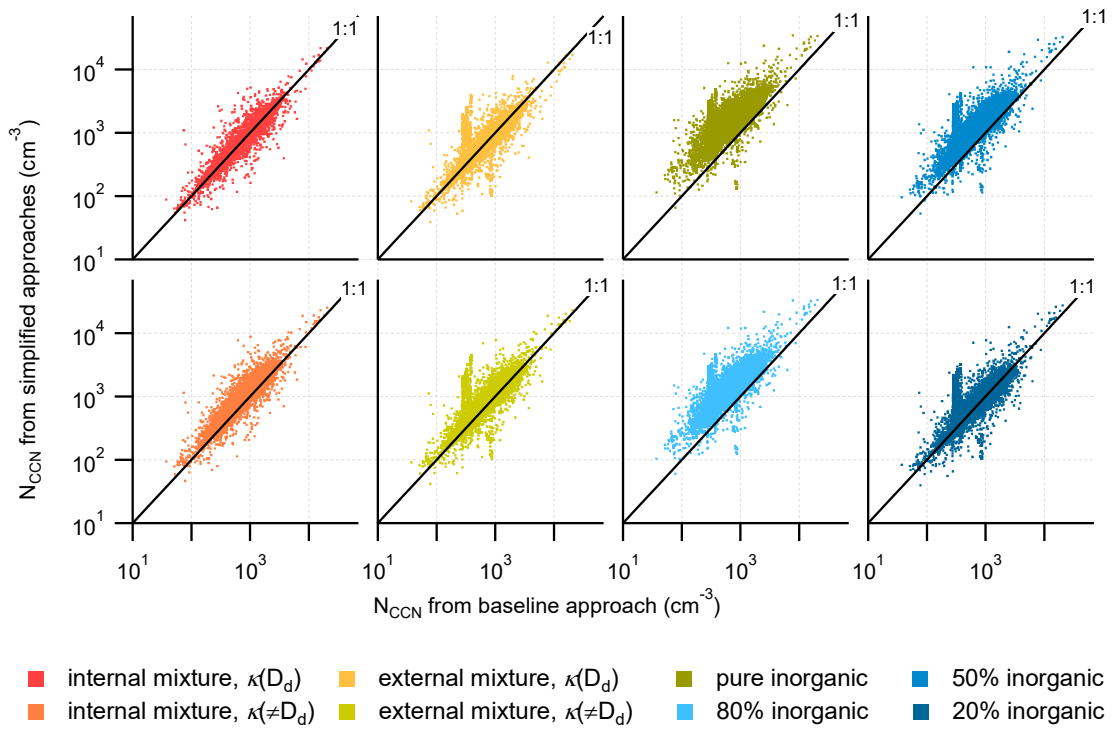

**Figure S4:**  $N_{CCN}$  estimated from simplified approaches vs. baseline approach at 0.45% for all 2011 data.

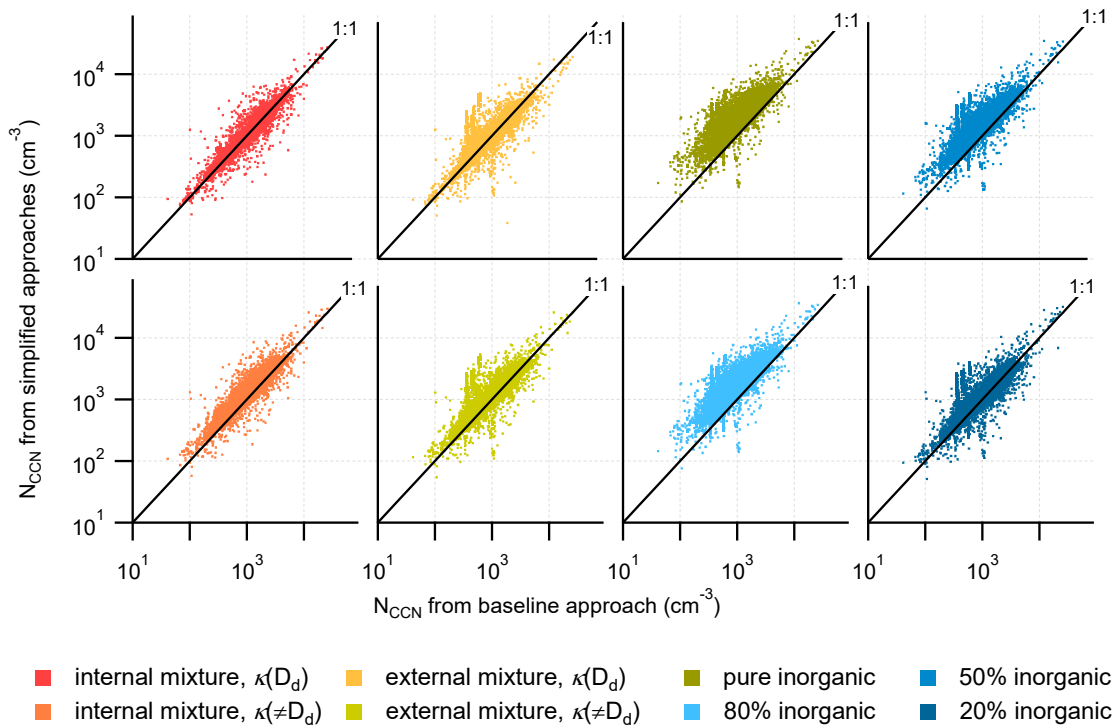

**Figure S5:**  $N_{CCN}$  estimated from simplified approaches vs. baseline approach at 0.65% for all 2011 data.
